# Supplementary material
Source: MDPI journal article supplement (https://www.mdpi.com/1424-2818/12/1/25)
Supplement: s1 [file s1]

**Table S1.** Analysis of Deviance for a GLM fitted model for hatch time of *Menidia menidia* larvae in the seven treatment diurnal acidification and hypoxia experiment.

|                     | LR Chisq | df | Pr(>Chisq)             |
|---------------------|----------|----|------------------------|
| Dissolved Oxygen    | 25.5781  | 2  | 2.791e <sup>-06*</sup> |
| pH                  | 3.3224   | 2  | 0.1899                 |
| pH:Dissolved Oxygen | 23.8492  | 2  | 6.625e <sup>-06*</sup> |

**Table S2.** Two-way ANOVA results for hatch success (arcsin transformed) of *Menidia menidia* larvae in the seven treatment diurnal acidification and hypoxia experiment.

|                     | df | Sum Sq | Mean Sq | F value | Pr(>F)               |
|---------------------|----|--------|---------|---------|----------------------|
| pH                  | 2  | 0.0677 | 0.0338  | 0.721   | 0.498                |
| Dissolved Oxygen    | 2  | 2.7674 | 1.3837  | 29.491  | 7.98e <sup>-7*</sup> |
| pH:Dissolved Oxygen | 2  | 0.0019 | 0.0009  | 0.020   | 0.980                |
| Residuals           | 21 | 0.9853 | 0.0469  |         |                      |

**Table S3.** Two-way ANOVA results for survival (normalized to # fish hatched per vessel, arcsin transformed) of *Menidia menidia* larvae in the seven treatment diurnal acidification and hypoxia experiment.

|                     | df | Sum Sq | Mean Sq | F value | Pr(>F)  |
|---------------------|----|--------|---------|---------|---------|
| pH                  | 2  | 0.6125 | 0.30626 | 4.646   | 0.0213* |
| Dissolved Oxygen    | 2  | 0.4047 | 0.20234 | 3.070   | 0.0677  |
| pH:Dissolved Oxygen | 2  | 0.0900 | 0.04498 | 0.682   | 0.5163  |
| Residuals           | 21 | 1.3843 | 0.06592 |         |         |

**Table S4A-C.** ANOVA analysis of Deviance for linear mixed effects model comparing model with (full) and without (null, pH, DO) treatment effects for length of *Menidia menidia* larvae in the seven treatment diurnal acidification and hypoxia experiment.

| A          | df | AIC    | BIC    | LogLik  | Deviance | Chisq  | Chi | Df | Pr(>Chisq) |
|------------|----|--------|--------|---------|----------|--------|-----|----|------------|
| Null model | 3  | 339.47 | 348.25 | -166.73 | 333.47   |        |     |    |            |
| Full model | 8  | 339.21 | 362.63 | -161.61 | 323.21   | 10.258 |     | 5  | 0.07       |

| B          | df | AIC    | BIC    | LogLik  | Deviance | Chisq  | Chi | Df | Pr(>Chisq) |
|------------|----|--------|--------|---------|----------|--------|-----|----|------------|
| pH model   | 5  | 339.79 | 354.43 | -164.90 | 329.79   |        |     |    |            |
| Full model | 8  | 339.21 | 362.63 | -161.61 | 323.21   | 6.5807 |     | 3  | 0.09       |

| C          | df | AIC    | BIC    | LogLik  | Deviance | Chisq | Chi | Df | Pr(>Chisq) |
|------------|----|--------|--------|---------|----------|-------|-----|----|------------|
| DO model   | 5  | 342.83 | 357.47 | -166.42 | 332.83   |       |     |    |            |
| Full model | 8  | 339.21 | 362.63 | -161.61 | 323.21   | 9.62  |     | 3  | 0.022*     |

**Table S5.** Analysis of Deviance for a GLM fitted model for hatch time of *Cyprinodon variegatus* larvae in the seven treatment diurnal acidification and hypoxia experiment.

|                     | LR Chisq | df | Pr(>Chisq) |
|---------------------|----------|----|------------|
| Dissolved Oxygen    | 16.5432  | 2  | 0.0002557* |
| pH                  | 7.7209   | 2  | 0.0210587* |
| pH:Dissolved Oxygen | 14.5709  | 2  | 0.0006854* |

**Table S6.** Two-way ANOVA results for hatch success (arcsin transformed) of *Cyprinodon variegatus* larvae in the seven treatment diurnal acidification and hypoxia experiment.

|                     | df | Sum Sq  | Mean Sq  | F value | Pr(>F)   |
|---------------------|----|---------|----------|---------|----------|
| pH                  | 2  | 0.00088 | 0.000442 | 0.159   | 0.85377  |
| Dissolved Oxygen    | 2  | 0.04530 | 0.022652 | 8.166   | 0.00238* |
| pH:Dissolved Oxygen | 2  | 0.02242 | 0.011208 | 4.040   | 0.03277* |
| Residuals           | 21 | 0.05825 | 0.002774 |         |          |

**Table S7.** Two-way ANOVA results for survival (normalized to # fish hatched per vessel, arcsin transformed) of *Cyprinodon variegatus* larvae in the seven treatment diurnal acidification and hypoxia experiment.

|                     | df | Sum Sq | Mean Sq  | F value | Pr(>F) |
|---------------------|----|--------|----------|---------|--------|
| pH                  | 2  | 0.0054 | 0.00269  | 0.133   | 0.877  |
| Dissolved Oxygen    | 2  | 0.0022 | 0.001105 | 0.054   | 0.947  |
| pH:Dissolved Oxygen | 2  | 0.0621 | 0.031074 | 1.532   | 0.239  |
| Residuals           | 21 | 0.4259 | 0.020280 |         |        |

**Table S8A-C.** ANOVA analysis of Deviance for linear mixed effects model comparing model with (full) and without (null, pH, DO) treatment effects for length of *Cyprinodon variegatus* larvae in the seven treatment diurnal acidification and hypoxia experiment.

| A          | df | AIC    | BIC    | LogLik  | Deviance | Chisq  | Chi | Df | Pr(>Chisq) |
|------------|----|--------|--------|---------|----------|--------|-----|----|------------|
| Null model | 3  | 841.74 | 852.64 | -417.87 | 835.74   |        |     |    |            |
| Full model | 9  | 837.18 | 869.89 | -409.59 | 819.18   | 16.555 |     | 6  | 0.011*     |

| B          | df | AIC    | BIC    | LogLik  | Deviance | Chisq  | Chi | Df | Pr(>Chisq) |
|------------|----|--------|--------|---------|----------|--------|-----|----|------------|
| pH model   | 5  | 840.93 | 859.10 | -415.46 | 830.93   |        |     |    |            |
| Full model | 9  | 837.18 | 869.89 | -409.59 | 819.18   | 11.748 |     | 4  | 0.019*     |

| C          | df | AIC    | BIC    | LogLik  | Deviance | Chisq  | Chi | Df | Pr(>Chisq) |
|------------|----|--------|--------|---------|----------|--------|-----|----|------------|
| DO model   | 5  | 838.56 | 856.74 | -414.28 | 828.56   |        |     |    |            |
| Full model | 9  | 837.18 | 869.89 | -409.59 | 819.18   | 9.3814 |     | 4  | 0.052      |

**Table S9.** Two-way ANOVA results for hatch time of *Menidia beryllina* larvae in the seven treatment diurnal acidification and hypoxia experiment.

|                     | df | Sum Sq | Mean Sq | F value | Pr(>F)   |
|---------------------|----|--------|---------|---------|----------|
| pH                  | 2  | 51.75  | 25.875  | 9.880   | 0.00095* |
| Dissolved Oxygen    | 2  | 2.68   | 1.339   | 0.511   | 0.60695  |
| pH:Dissolved Oxygen | 2  | 24.00  | 12.000  | 4.582   | 0.02232* |
| Residuals           | 21 | 55.00  | 2.619   |         |          |

**Table S10.** Two-way ANOVA results for hatch success (arcsin transformed) of *Menidia beryllina* larvae in the seven treatment diurnal acidification and hypoxia experiment.

|                     | df | Sum Sq | Mean Sq | F value | Pr(>F)   |
|---------------------|----|--------|---------|---------|----------|
| pH                  | 2  | 0.0782 | 0.0391  | 1.149   | 0.336    |
| Dissolved Oxygen    | 2  | 1.2173 | 0.6086  | 17.881  | 2.92e-5* |
| pH:Dissolved Oxygen | 2  | 0.0435 | 0.0217  | 0.639   | 0.538    |
| Residuals           | 21 | 0.7148 | 0.0340  |         |          |

**Table S11.** Two-way ANOVA results for survival (normalized to # fish hatched per vessel, arcsin transformed) of *Menidia beryllina* larvae in the seven treatment diurnal acidification and hypoxia experiment.

|                     | df | Sum Sq | Mean Sq | F value | Pr(>F)   |
|---------------------|----|--------|---------|---------|----------|
| pH                  | 2  | 0.0743 | 0.0372  | 0.498   | 0.615    |
| Dissolved Oxygen    | 2  | 2.6032 | 1.3016  | 17.449  | 3.43e-5* |
| pH:Dissolved Oxygen | 2  | 0.1003 | 0.0501  | 0.672   | 0.521    |
| Residuals           | 21 | 1.5665 | 0.0746  |         |          |

**Table S12A-C.** ANOVA analysis of Deviance for linear mixed effects model comparing model with (full) and without (null, pH, DO) treatment effects for length of *Menidia beryllina* larvae in the seven treatment diurnal acidification and hypoxia experiment.

| A          | df | AIC    | BIC    | LogLik  | Deviance | Chisq  | Chi | Df | Pr(>Chisq) |
|------------|----|--------|--------|---------|----------|--------|-----|----|------------|
| Null model | 3  | 243.49 | 251.46 | -118.75 | 237.49   |        |     |    |            |
| Full model | 9  | 246.83 | 270.71 | -114.41 | 228.83   | 8.6648 |     | 6  | 0.1933     |

| B          | df | AIC    | BIC    | LogLik  | Deviance | Chisq  | Chi | Df | Pr(>Chisq) |
|------------|----|--------|--------|---------|----------|--------|-----|----|------------|
| pH model   | 5  | 239.12 | 252.39 | -114.56 | 229.12   |        |     |    |            |
| Full model | 9  | 246.83 | 270.71 | -114.41 | 228.83   | 0.2954 |     | 4  | 0.9901     |

| C          | df | AIC    | BIC    | LogLik  | Deviance | Chisq  | Chi | Df | Pr(>Chisq) |
|------------|----|--------|--------|---------|----------|--------|-----|----|------------|
| DO model   | 5  | 246.83 | 260.10 | -118.42 | 236.83   |        |     |    |            |
| Full model | 9  | 246.83 | 270.71 | -114.41 | 228.83   | 8.0028 |     | 4  | 0.092      |

**Table S13.** One way Anova results for hatch time of *Menidia beryllina* larvae in the four treatment diurnal acidification and hypoxia experiment.

|                | df | Sum Sq | Mean Sq | F value | Pr(>F) |
|----------------|----|--------|---------|---------|--------|
| Between groups | 3  | 3.433  | 1.144   | 2.289   | 0.135  |
| Residuals      | 11 | 5.500  | 0.500   |         |        |

**Table S14.** One way Anova results for hatch success (arcsin transformed) of *Menidia beryllina* larvae in the four treatment diurnal acidification and hypoxia experiment.

|                | df | Sum Sq | Mean Sq | F value | Pr(>F)    |
|----------------|----|--------|---------|---------|-----------|
| Between groups | 3  | 0.6222 | 0.20740 | 16      | 0.000252* |
| Residuals      | 11 | 0.1425 | 0.01296 |         |           |

**Table S15.** One way Anova results for survival (normalized to # fish hatched per vessel, arcsin transformed) of *Menidia beryllina* larvae in the four treatment diurnal acidification and hypoxia experiment.

|                | df | Sum Sq | Mean Sq | F value | Pr(>F)  |
|----------------|----|--------|---------|---------|---------|
| Between groups | 3  | 0.2210 | 0.07368 | 4.069   | 0.0359* |
| Residuals      | 11 | 0.1992 | 0.01811 |         |         |

**Table S16.** ANOVA analysis of Deviance for linear mixed effects model comparing model with (full) and without (null) treatment effects for length of *Menidia beryllina* larvae in the four-treatment diurnal acidification and hypoxia experiment.

|            | df | AIC    | BIC    | LogLik  | Deviance | Chisq  | Chi Df | Pr(>Chisq) |
|------------|----|--------|--------|---------|----------|--------|--------|------------|
| Null model | 3  | 447.43 | 456.44 | -220.72 | 441.43   |        |        |            |
| Full model | 6  | 432.88 | 450.90 | -210.44 | 420.88   | 20.555 | 3      | 0.0001*    |

**Table S17.** One way Anova results for hatch time of *Menidia beryllina* I larvae in the four treatment diurnal duration acidification and hypoxia experiment.

|                | df | Sum Sq | Mean Sq | F value | Pr(>F) |
|----------------|----|--------|---------|---------|--------|
| Between groups | 3  | 1.667  | 0.5556  | 2.222   | 0.163  |
| Residuals      | 8  | 2.000  | 0.2500  |         |        |

**Table S18.** One way Anova results for hatch success (arcsin transformed) of *Menidia beryllina* I larvae in the four treatment diurnal duration acidification and hypoxia experiment.

|                | df | Sum Sq | Mean Sq | F value | Pr(>F)  |
|----------------|----|--------|---------|---------|---------|
| Between groups | 3  | 0.2107 | 0.07023 | 4.746   | 0.0347* |
| Residuals      | 8  | 0.1184 | 0.01480 |         |         |

**Table S19.** One way Anova results for survival (normalized to # fish hatched per vessel, arcsin transformed) of *Menidia beryllina* I larvae in the four treatment diurnal duration acidification and hypoxia experiment.

|                | df | Sum Sq | Mean Sq | F value | Pr(>F)  |
|----------------|----|--------|---------|---------|---------|
| Between groups | 3  | 0.2291 | 0.07636 | 5.111   | 0.0289* |
| Residuals      | 8  | 0.1195 | 0.01494 |         |         |

**Table S20.** ANOVA analysis of Deviance for linear mixed effects model comparing model with (full) and without (null) treatment effects for length of *Menidia beryllina* I larvae in the four treatment diurnal duration acidification and hypoxia experiment.

|            | df | AIC    | BIC    | LogLik  | Deviance | Chisq  | Chi Df | Pr(>Chisq) |
|------------|----|--------|--------|---------|----------|--------|--------|------------|
| Null model | 3  | 326.45 | 335.25 | -160.22 | 320.45   |        |        |            |
| Full model | 6  | 313.36 | 330.97 | -150.68 | 301.36   | 19.084 | 3      | 0.0003*    |

**Table S21.** Analysis of Deviance for GLM fitted model for hatch time of *Menidia beryllina* II larvae in the four treatment diurnal duration acidification and hypoxia experiment.

|                | LR Chisq | Df | Pr(>Chisq) |
|----------------|----------|----|------------|
| Between groups | 0.33904  | 3  | 0.9525     |

**Table S22.** One way Anova results for hatch success (arcsin transformed) of *Menidia beryllina* II larvae in the four treatment diurnal duration acidification and hypoxia experiment.

|                | df | Sum Sq | Mean Sq | F value | Pr(>F) |
|----------------|----|--------|---------|---------|--------|
| Between groups | 3  | 0.1574 | 0.05246 | 0.572   | 0.644  |
| Residuals      | 12 | 1.1001 | 0.09167 |         |        |

**Table S23.** One way Anova results for survival (normalized to # fish hatched per vessel, arcsin transformed) of *Menidia beryllina* II larvae in the four treatment diurnal duration acidification and hypoxia experiment.

|                | df | Sum Sq | Mean Sq | F value | Pr(>F)    |
|----------------|----|--------|---------|---------|-----------|
| Between groups | 3  | 0.4543 | 0.15143 | 6.506   | 0.00733** |
| Residuals      | 12 | 0.2793 | 0.02328 |         |           |

**Table S24.** ANOVA analysis of Deviance for linear mixed effects model comparing model with (full) and without (null) treatment effects for length of *Menidia beryllina* II larvae in the four treatment diurnal duration acidification and hypoxia experiment.

|            | df | AIC    | BIC    | LogLik  | Deviance | Chisq  | Chi Df | Pr(>Chisq) |
|------------|----|--------|--------|---------|----------|--------|--------|------------|
| Null model | 3  | 316.12 | 326.06 | -155.06 | 310.12   |        |        |            |
| Full model | 6  | 310.89 | 330.77 | -149.44 | 298.89   | 11.231 | 3      | 0.011*     |

**Table S25.** Analysis of Deviance for GLM fitted model for hatch time of *Menidia menidia* larvae in the four treatment diurnal duration acidification and hypoxia experiment.

|                | LR Chisq | Df | Pr(>Chisq) |
|----------------|----------|----|------------|
| Between groups | 4.5078   | 3  | 0.2116     |

**Table S26.** One way Anova results for hatch success (arcsin transformed) of *Menidia menidia* larvae in the four treatment diurnal acidification duration and hypoxia experiment.

|                | df | Sum Sq | Mean Sq | F value | Pr(>F) |
|----------------|----|--------|---------|---------|--------|
| Between groups | 3  | 0.2295 | 0.07649 | 2.031   | 0.163  |
| Residuals      | 12 | 0.4520 | 0.03766 |         |        |

**Table S27.** One way Anova results for survival (normalized to # fish hatched per vessel, arcsin transformed) of *Menidia menidia* larvae in the four treatment diurnal duration acidification and hypoxia experiment.

|                | df | Sum Sq | Mean Sq | F value | Pr(>F)    |
|----------------|----|--------|---------|---------|-----------|
| Between groups | 3  | 0.3380 | 0.1293  | 7.067   | 0.00543** |
| Residuals      | 12 | 0.2196 | 0.0183  |         |           |

**Table S28.** ANOVA analysis of Deviance for linear mixed effects model comparing model with (full) and without (null) treatment effects for length of *Menidia menidia* larvae in the four treatment diurnal duration acidification and hypoxia experiment.

|            | df | AIC    | BIC    | LogLik  | Deviance | Chisq  | Chi Df | Pr(>Chisq) |
|------------|----|--------|--------|---------|----------|--------|--------|------------|
| Null model | 3  | 164.38 | 172.10 | -79.188 | 158.38   |        |        |            |
| Full model | 6  | 155.00 | 170.44 | -71.498 | 143.00   | 15.381 | 3      | 0.002*     |
